1 **“It’s his cheerfulness that gives me hope”: A Qualitative Analysis of Access to Pediatric**  
2 **Cancer Care in Northern Tanzania**

3 **Authors and Affiliations:**

4 Madeline Metcalf<sup>1</sup>, Happiness D. Kajoka<sup>2</sup>, Esther Majaliwa<sup>2,3</sup>, Anna Tupetz<sup>1,4</sup>, Catherine A.  
5 Staton<sup>1,4</sup>, João Ricardo Vissoci<sup>1,4</sup>, Pamela Espinoza<sup>1</sup>, Cesia Cotache-Condor<sup>1,5</sup>, Henry E. Rice<sup>1,6</sup>,  
6 Blandina T. Mmbaga<sup>2,7</sup>, Emily R. Smith<sup>1,4</sup>

7  
8 <sup>1</sup>Duke Global Health Institute, Duke University, Durham, NC, USA; <sup>2</sup>Kilimanjaro Christian  
9 Medical University College, Moshi, Tanzania; <sup>3</sup>Pediatric Hematology and Oncology Services,  
10 Kilimanjaro Christian Medical Centre, Moshi, Tanzania; <sup>4</sup>Department of Emergency Medicine,  
11 Duke University Medical Center, Durham, North Carolina, USA; <sup>5</sup>Duke Center for Global  
12 Surgery and Health Equity, Duke University, Durham, North Carolina, USA; <sup>6</sup>Division of  
13 Pediatric Surgery, Department of Surgery, Duke University Medical Center, Durham, North  
14 Carolina, USA; <sup>7</sup>Kilimanjaro Clinical Research Institute, Kilimanjaro Christian Medical Centre,  
15 Moshi, Tanzania

16  
17 **Word count: 5310**

18 **Corresponding author:**

19 Madeline A. Metcalf

20 Duke Global Health Institute, Duke University, 310 Trent Hall, Durham, NC 27705

21 [madeline.metcalf@duke.edu](mailto:madeline.metcalf@duke.edu) | +1 208 305 8501

22 **ABSTRACT**

23 Background:

24 Pediatric cancer is a significant and growing burden in low- and middle-income countries. The  
25 objective of this project was to describe the factors influencing access to pediatric cancer care in  
26 Northern Tanzania using the Three Delays Model.

27  
28 Methods:

29 This was a cross-sectional qualitative study conducted between June and September 2023 at  
30 Kilimanjaro Christian Medical Centre (KCMC). Parents and caregivers of children obtaining  
31 pediatric cancer care at KCMC were approached for participation in in-depth interviews (IDIs)  
32 and a demographic survey. All IDIs were facilitated in Swahili by a bilingual research  
33 coordinator. Thirteen IDIs and surveys were completed during the study period. Analysis utilized  
34 inductive and deductive coding approaches to identify dominant themes and sub-themes  
35 impacting access to pediatric oncology care.

36  
37 Results:

38 Participants reported significant financial barriers to accessing pediatric cancer care along the  
39 entire care continuum. Early delays were impacted by waiting for symptoms to resolve or  
40 worsen. The most substantial delays resulted from health infrastructure at mid-level health  
41 facilities, misdiagnoses, and delayed referral to KCMC for treatment. Participants did not  
42 describe delays after arrival to KCMC and rather offered perspective on their child's cancer  
43 diagnosis, their concerns while obtaining care, and their hopes for the future. Financial support  
44 provided by the Tanzanian government was the only facilitator noted by participants.

45

46 Conclusions:

47 We suggest targeted interventions including 1) empowerment of CHWs and local traditional  
48 healers to advocate for earlier care seeking behavior, 2) implementation of clinical structures and  
49 training at intermediary medical centers aimed at earlier referral to a treatment facility, 3)  
50 incorporation of support and education initiatives for families of children with a cancer  
51 diagnosis. Lastly, we suggest that national health plans include pediatric cancer care.

## 52 INTRODUCTION

53 The Lancet Oncology Commission on Sustainable Care for Children with Cancer estimates that  
54 there will be 13.7 million newly diagnosed cases of pediatric cancer between 2020 and 2050,  
55 nearly 90% of which will occur in low or lower-middle income countries (LMICs).(1) Further,  
56 the Commission calculates that with the current global investment, diagnostic, and treatment  
57 provision trends, 11.1 million children will experience a cancer-attributable death during this 30  
58 year period, with 84% of these children residing in LMICs.(1) Considering the World Health  
59 Organization (WHO) Global Initiative for Childhood Cancer’s 2030 goal of 60% 5-year survival  
60 for pediatric cancer patients worldwide, significant scale-up in the financing, accessibility, and  
61 availability of quality pediatric oncology services is required.(1–3)

62  
63 In Tanzania, a LMIC in East Africa, several factors impact families’ ability to obtain care for  
64 their child diagnosed with cancer such as health education, transportation, household finances,  
65 and traditional medicine.(4,5) Tanzania has three health centers with the capacity to provide  
66 comprehensive cancer care to children, including diagnostic, laboratory, and treatment services.  
67 Further, six licensed pediatric oncologists serve the entire country with a population of more than  
68 33 million children.(6) Recent research conducted at Kilimanjaro Christian Medical Centre  
69 (KCMC), one of the country’s three tertiary level centers with cancer care capacity, reports that  
70 over 75% of pediatric cancer patients are diagnosed with stage III or IV cancer, suggesting  
71 notable delays in access to care.(7)

72  
73 Initially developed for examining maternal mortality in low-income settings, “Three Delays  
74 Model” has been used to classify barriers and facilitators to maternal, emergency, and neonatal

75 care in Tanzania.(4,5,8,9) However, the model has yet to be qualitatively applied to pediatric  
76 cancer care in the country. The Three Delays Model organizes barriers and facilitators to  
77 healthcare service procurement into three groups including: 1) delays in seeking care, 2) delays  
78 in reaching care, and 3) delays in receiving care.(9) The initial decision to seek care may be  
79 impacted by factors such as a household's socioeconomic status, health education, cultural or  
80 spiritual beliefs, and lack of geographic proximity or transportation to a health center.(4) For  
81 pediatric cancer, the second delay is associated with higher rates of morbidity and mortality and  
82 can be influenced by health service capacity and referral systems at smaller health centers.(2,10)  
83 This second delay can also be impacted by similar sociocultural factors described in the first  
84 delay.(4,10) The final delay is concerned with delays experienced once reaching the definitive  
85 medical center where diagnosis and treatment services can be provided. While not always  
86 contained within the framework, we have included financial influences within each of these  
87 delays to highlight the economic toll of pediatric cancer care.

88  
89 Although there is a growing body of global epidemiological literature outlining the prevalence  
90 and incidence trends of pediatric cancer,(7,11,12) there remains a gap in qualitative research that  
91 illustrates the experience of families in obtaining oncology care. To understand the factors  
92 influencing increased mortality and limited access to pediatric cancer care, we gathered caregiver  
93 perspectives of the journey to care with the Three Delays Model, beginning from the  
94 identification of initial symptoms and extending beyond obtaining care to include post-treatment  
95 plans.

96

97 **METHODS**

## 98 **Study Design**

99 This cross-sectional qualitative study used data collected from in-depth interviews (IDIs) with  
100 caregivers of children obtaining pediatric oncology care at KCMC between June and September  
101 2023.

102

## 103 **Research Team and Reflexivity**

104 The research team involved in data collection and analysis included a research coordinator (HK),  
105 KCMC's pediatric oncologist (EM), two graduate students (MM, PE), a postdoctoral fellow  
106 (AT) and an epidemiologist and principal investigator of the study (ERS). All IDIs were  
107 facilitated by the bilingual, female research coordinator (HK) based at KCMC and an employed  
108 member of the research team. The research coordinator is professionally trained as a medical  
109 doctor in Tanzania but was not involved in any patient care or known to the participants prior to  
110 enrollment. HK was trained in qualitative methods by AT prior to the commencement of the  
111 study.

112

## 113 **Setting**

114 Located within the Kilimanjaro region of Tanzania, KCMC is classified as a tertiary level  
115 medical center, serving nearly 11 million patients each year.(13) The KCMC pediatric cancer  
116 ward serves an estimated 100-150 patients a year and currently hosts one oncologist (EM) who is  
117 responsible for the diagnosis and treatment of all pediatric cancer cases.(14)

118

## 119 **Participant Screening and Enrollment**

120 Using purposive sampling methods, potential participants were approached for study  
121 participation upon presentation for care at the KCMC pediatric oncology ward between June and  
122 September 2023. Screening and enrollment of study participants was led by the local research  
123 coordinator (HK) and clinical staff (EM). Potential participants were approached based on the  
124 following inclusion criteria: 1) patient was 14 years old or younger, 2) patient was actively  
125 obtaining treatment for a diagnosed cancer condition, 3) caregiver was at least 18 years old, 4)  
126 caregiver spoke Swahili or English (fluent languages of the research coordinator). Participants  
127 were excluded from the study if they had cognitive problems that would inhibit the caregiver's  
128 ability to participate or if the caregiver declined participation. Due to differences in treatment  
129 provision, inclusion was limited to patients between 0-14 years of age to report solely on  
130 children and early adolescents rather than older adolescents and young adults. During screening,  
131 two potential interviewees declined participation.

132

### 133 **Data Collection Procedures**

134 All interviews took place in a quiet, private location in the KCMC pediatric oncology ward. The  
135 interviewer's name and role within the study were disclosed to participants prior to the interview.  
136 However, no additional information was shared regarding interviewer bias, assumptions, or  
137 personal interests in the study. After completing the written informed consent procedures, the  
138 research coordinator completed a short paper survey with the participant to collect household  
139 demographic data such as relationship to the child, child's age and sex, urban/rural home  
140 community designation, ethnic and religious affiliation, education level, occupation, household  
141 and medical expenses, household monthly income, and health insurance status.

142

143 Interviews were performed using a semi-structured interview guide containing open-ended  
144 questions and probes based on the Three Delays Model. The interview guide was developed by  
145 our team (CCC, MM) based on the conceptual framework and an existing interview guide  
146 developed by the Harvard Medical School Program in Global Surgery and Social Change.(10,15)  
147 We pilot tested the interview guide with two caregivers of children who were in remission from  
148 their cancer diagnosis and obtaining follow up services at KCMC. Based on the review and  
149 discussion of the pilot transcripts, final amendments were made to the guide. Mainly, questions  
150 were rephrased to be linguistically appropriate for the study population. The interview guide was  
151 developed in English and later translated to Swahili by the research coordinator (HK) and  
152 validated by the bilingual pediatric oncologist and co-principal investigator at KCMC (EM).

153

154 In addition to interviewer field notes, all interviews were audio recorded for transcription and  
155 translation. The research coordinator first transcribed interviews verbatim in Swahili and then  
156 translated the interviews into English. As an additional quality check, a KCMC research assistant  
157 not involved in the facilitation of the interviews compared the Swahili and English transcripts for  
158 translation validity. No repeat interviews were conducted, and transcripts were not returned to  
159 the participants for comments and/or corrections. Interviews lasted between 30-60 minutes and  
160 participants received no compensation for their participation. Audio recordings, Swahili  
161 interview transcripts, and final English transcript translations were uploaded to a password-  
162 protected and encrypted electronic data repository available to only the qualitative study team for  
163 analysis. Paper surveys were stored in a locked file cabinet separate from all informed consent  
164 and screening documents at KCMC until the demographic data had been de-identified and  
165 transferred to Duke University via the electronic data repository. Caregiver IDIs were conducted



166 until the research team unanimously agreed that data saturation had been met, defined as the  
167 absence of new codes after three consecutive interviews.

## 168 **Analysis**

169 After four interviews had been completed, the primary qualitative analyst (MM) coded the  
170 interviews using NVivo 12 software (Lumivero, Denver, CO, USA).(16) Utilizing both inductive  
171 and deductive coding approaches, prevalent themes were identified within the Three Delays  
172 Model and a codebook was created to guide the analysis of the proceeding interviews. To  
173 maintain analytical validity, the codebook was discussed weekly between the analyst (MM),  
174 research coordinator (HK), and Duke University principal investigator (ERS). Changes were  
175 made to the identified themes and sub-themes as appropriate. No revisions were made after the  
176 10<sup>th</sup> interview and all interviews were recoded with the final version of the codebook. For  
177 analytical rigor, a random sample of 6 interviews were coded by the KCMC research coordinator  
178 (HK) and a graduate research assistant (PE). A coding comparison query resulted in >90% coder  
179 agreeability between the three coders.

180

## 181 **Ethical Considerations**

182 Written informed consent was obtained, and participants received a hard copy of the consent  
183 document in their preferred language (Swahili or English) prior to the start of the interview. Data  
184 storage and study procedures were approved by the Duke University and KCMC institutional  
185 review boards (IRBs) and the Tanzania National Institute for Medical Research (NIMR) prior to  
186 the commencement of the study. We utilized the Consolidated Criteria for Reporting Qualitative  
187 Research (COREQ) guidelines which is included as supplemental information with this  
188 manuscript.(17)

189

## 190 **RESULTS**

### 191 **Demographic Characteristics**

192 Between June and September 2023, a total of 13 caregiver IDIs and complimentary demographic  
193 surveys were completed. Majority of the interviewed participants identified themselves as the  
194 child's mother (61.5%) and more than 90% of interviewees designated their household's home  
195 community as rural (Table 1). The most common household size including both adults and  
196 children living in the home was between 2-6 individuals (53.8%), with the most common  
197 religion being Christianity (53.8%). Of the 13 pediatric patients, 7 were male (53.8%) and 6 were  
198 female (46.2%). Three of these patients were between the ages of 0-2 years of age, four were  
199 between the ages of 3-6 years, two children were within 7-10 years, and four children were  
200 between the ages of 11-14 years. None of the interviewees reported having health insurance.

201

202

203 Table 1: Study Population Demographics

| Characteristic                               | Total<br>% (n) |
|----------------------------------------------|----------------|
| <b>Interviewee's Relationship to Child</b>   |                |
| Mother                                       | 61.5 (8)       |
| Father                                       | 7.7 (1)        |
| Sibling                                      | 15.4 (2)       |
| Uncle                                        | 15.4 (2)       |
| <b>Child's Age (Years)</b>                   |                |
| 0-2                                          | 23.1 (3)       |
| 3-6                                          | 30.8 (4)       |
| 7-10                                         | 15.4 (2)       |
| 11-14                                        | 30.8 (4)       |
| <b>Child's Sex</b>                           |                |
| Male                                         | 53.8 (7)       |
| Female                                       | 46.2 (6)       |
| <b>Rural-Urban Designation</b>               |                |
| Rural                                        | 92.3 (12)      |
| Urban                                        | 7.7 (1)        |
| <b>Household Size</b>                        |                |
| 2-6                                          | 53.8 (7)       |
| 7-11                                         | 38.5 (5)       |
| 12+                                          | 7.7 (1)        |
| <b>Caregiver Completed Education</b>         |                |
| No Formal Education                          | 7.7 (1)        |
| Primary                                      | 84.6 (11)      |
| Secondary                                    | 7.7 (1)        |
| College                                      | 0.0 (0)        |
| <b>Religion</b>                              |                |
| Christian                                    | 53.8 (7)       |
| Muslim                                       | 30.8 (4)       |
| None                                         | 15.4 (2)       |
| <b>Occupation of Main Household Provider</b> |                |
| Skilled Employment                           | 7.7 (1)        |
| Farming and Livestock                        | 69.2 (9)       |
| Self Employed                                | 23.1 (3)       |
| <b>Insurance Status</b>                      |                |
| Yes                                          | 0.0 (0)        |
| No                                           | 100.0 (13)     |

204

205

206 **Qualitative Results**

207 Organized within the Three Delays Model, Figure 1 outlines the thematic codes included in this  
 208 manuscript. In addition to outlining the delays experienced in seeking, reaching, and receiving  
 209 care, participants provided contextual background regarding their journey to care at KCMC.

210

| <b>Three Delays Model</b>                                                                                             |                                                                                                                                                                                             |                                                                                                                                                                 |
|-----------------------------------------------------------------------------------------------------------------------|---------------------------------------------------------------------------------------------------------------------------------------------------------------------------------------------|-----------------------------------------------------------------------------------------------------------------------------------------------------------------|
| <b>Seeking Care</b> →                                                                                                 | <b>Reaching Care</b> →                                                                                                                                                                      | <b>Receiving Care</b>                                                                                                                                           |
| <u>Delays:</u> <ul style="list-style-type: none"> <li>• Waiting for Worsening Symptoms</li> <li>• Finances</li> </ul> | <u>Delays:</u> <ul style="list-style-type: none"> <li>• Traditional Medicine</li> <li>• Hospital Infrastructure</li> <li>• Referral System</li> <li>• Travel</li> <li>• Finances</li> </ul> | <u>Delays:</u> <ul style="list-style-type: none"> <li>• Finances</li> </ul>                                                                                     |
| <u>Contextual Factors:</u> <ul style="list-style-type: none"> <li>• Initial Symptoms</li> </ul>                       | <u>Contextual Factors:</u> <ul style="list-style-type: none"> <li>• Care Received Prior to KCMC</li> </ul>                                                                                  | <u>Contextual Factors:</u> <ul style="list-style-type: none"> <li>• Care Received at KCMC</li> <li>• Caregiver Concerns</li> <li>• Treatment Success</li> </ul> |

211 *Figure 1: Thematic codes presented in this manuscript.*

212

213 Analysis suggested a duality between delays discussed by IDI participants and delays perceived  
 214 by the research team. IDI responses suggested that families experienced delays stemming from  
 215 traditional medicine, finances (across all three delays), waiting for worsening symptoms, and  
 216 hospital infrastructure. The qualitative research team agreed with all participant delays noted  
 217 above, however, suggested the inclusion of referral systems and travel as additional barriers.

218

219 **Delay 1 - Seeking Care**

220 **Initial symptoms**

221 Caregivers outlined the symptoms that motivated care seeking behavior. One participant detailed  
222 some of the symptoms noticed within their child before seeking care, *“At first, it looked like he*  
223 *had some sort of squinting or eye misalignment, but it wasn't squinting. It was actually his eye*  
224 *protruding because it was inside, and it started coming out.”* (IDI Participant 6) Many  
225 participants suggested the initial local diagnosis *“child of the eye.”*

226  
227 Another respondent discussed the changes over time in the formation of their child’s abdomen  
228 stating, *“I began to notice small lump appearing in the abdomen. As time went on, the lump grew*  
229 *larger, and the whole abdomen was distended.”* (IDI Participant 8)

230

### 231 **Waiting for worsening symptoms**

232 Delays in initiation of care seeking behavior were often a result of waiting for the child’s  
233 condition to worsen or resolve over time. One mother discussed how they delayed care seeking  
234 behavior for over six months with hope that the condition would heal. The mother stated, *“I*  
235 *thought it would go away on its own, that’s why I waited because I had never seen anything like*  
236 *it before. So, I thought it would resolve itself, and I waited but rather it grew.”* (IDI Participant  
237 6)

238

239 Another participant explained how their child’s condition recurred despite medicine provided at  
240 home, *“I would give him medicine, and he would seem better, so he would go back to school. It*  
241 *went on like that, back and forth. He would get better, then worse. But then, he got really sick,*  
242 *all of his nostrils were like rotten. The sores were like rotting wounds.”* (IDI Participant 12)

243

244 **Finances**

245 More than half of participants discussed how household finances resulted in an early delay to  
246 seeking care. Caregivers explained how they had to sell land or possessions to initiate care  
247 seeking. A sibling describes this within their household, *“The trees they sold were trees they had  
248 planted on their property, and when they faced financial difficulties, they decided to sell them to  
249 get money for treatment.”* (IDI Participant 10) Another participant described how they had to  
250 *“throw”* or sell possessions to collect enough money for transportation to the first medical  
251 center. *“I had to carry a bag of rice and throw it so that we could get transportation to the  
252 healthcare center...I had some roosters, and I threw them, and that's what helped me to travel to  
253 Ifakara.”* (IDI Participant 2)

254

255 A participant noted how government support has served as a financial facilitator in seeking care  
256 for their child. *“We were financially constrained, and when the child fell ill, we didn't have the  
257 means to seek immediate medical attention. Fortunately, the government stepped in and brought  
258 me here...If it weren't for the government's support, I don't know what would have happened.”*  
259 (IDI Participant 1) No additional examples of government or social support schemes for  
260 financing medical expenses were provided.

261

262 **Delay 2 - Reaching Care**

263 **Traditional medicine**

264 Once the care seeking process began, cultural and spiritual beliefs suggesting traditional  
265 medicine techniques influenced when caregivers sought care from health centers. Many  
266 participants noted how traditional medicine was used as first aid before opting to seek additional

267 medical care. One participant explained how traditional remedies have proven effective within  
268 their community, *“Yes, there are some people who have used them and found them helpful... But*  
269 *for me, they didn't help.”* (IDI Participant 1)

270  
271 Participants also discussed how economic factors impacted their decision to use traditional  
272 medicines, often noting the *“fear”* associated with the costs of medical treatment, particularly in  
273 rural areas (IDI Participant 2). *“The other factor that has contributed is finances because you*  
274 *find the child falls suddenly ill and you don't have anything in your pocket, you say, let's try*  
275 *traditional medicine since even other children in the village have used it and recovered.”* (IDI  
276 Participant 3)

277

### 278 **Care received prior to KCMC**

279 Many participants explained how their child's condition had been misinterpreted at intermediary  
280 health facilities and been prescribed ineffective medications prior to KCMC. One mother  
281 explained how their child had repeatedly been treated for malaria before obtaining their cancer  
282 diagnosis, *“So, whenever he had a fever at night, we would rush him to the hospital. They would*  
283 *say it's just a fever or sometimes say he has severe malaria.”* (IDI Participant 1) Most often,  
284 children were prescribed pain medications which failed to provide long-term relief or treatment  
285 for the child's condition. *“It was about two months that he was using those medications. Then I*  
286 *went to Ifakara, and they also gave me some medications just for soothing.”* (IDI Participant 2)

287

288 A minority of respondents discussed how initial testing was done at smaller health facilities  
289 which led to their final arrival at KCMC, but diagnostic services were never mentioned at these

290 medical centers. One participant explained this experience, *“When we reached the regional*  
291 *hospital, they tested him for liver disease, took an X-ray, did an ultrasound, but the medication*  
292 *didn't help either. That's when they told us to come here (KCMC).”* (IDI Participant 3)

293

#### 294 **Hospital infrastructure**

295 More than half of respondents suggested that workforce, laboratory, diagnostic, and treatment  
296 capacity for pediatric patients at smaller health centers contributed to delays in arrival to KCMC.  
297 One mother explained the experience of not being able to obtain testing services for their child at  
298 multiple health facilities, *“When you go to a hospital, they just touch the child briefly and say*  
299 *they can't help, or they just look at him and say they can't do anything, go somewhere else. You*  
300 *move to another hospital, and they say the same thing. Meanwhile, the child's condition is*  
301 *troubling, and he's crying. As a mother, you feel bad, and sometimes you even start crying out of*  
302 *pity for your child... They just look at the child without conducting proper tests.”* (IDI  
303 Participant 1)

304

305 Another respondent explained their perspective regarding the capacity to provide quality and  
306 sufficient care at some medical centers and how this impacts the child's health status, *“Well, you*  
307 *know, when I started at those smaller hospitals, what I realized is that you could have a patient*  
308 *that is okay and later on their disease worsens just because they lack that specific expertise or*  
309 *equipment.”* (IDI Participant 11)

310

#### 311 **Referral system**



312 Respondents described how they were referred to multiple mid-level facilities before KCMC,  
313 outlining how the stepwise referral system within the country contributed to delays. While these  
314 referrals may have been linked to other delays in diagnoses and infrastructure outlined above, the  
315 system itself presented challenges in obtaining timely care. One participant explained the  
316 challenges related to delayed referrals, *“Perhaps one challenge is that when you arrive at a*  
317 *hospital, they should give you a referral early because sometimes you arrive, and they perform*  
318 *tests and tests. You find you have spent like 400,000 shillings and the child has not even*  
319 *improved. Later on, when you’re already broke that’s when they give you a referral.”* (IDI  
320 Participant 3)

321  
322 Despite participants commonly noting multiple week- or month-long delays in being referred to  
323 KCMC, caregivers expressed overall satisfaction with the referral system, focusing on how the  
324 system had helped their family. *“I haven’t seen any issue because this is where the treatment is.*  
325 *Even if I had continued to want to remain there and there was no treatment so when they brought*  
326 *me here, it wasn’t a problem for me because I saw and believed that my child would get better*  
327 *here.”* (IDI Participant 8)

## 328 329 **Travel**

330 Caregivers and children endured long journeys to receive care at KCMC. Travel time varied  
331 between participants, ranging from three hours to two days. One participant explained the  
332 emotional and physical challenges of traveling with a sick child, *“It was difficult for me to travel*  
333 *with the child in public transport the wound was still fresh, and I was carrying the child in my*  
334 *arms.”* (IDI Participant 4) Caregivers also expressed variability in the travel experience

335 depending on the type of transportation and familiarity with the area, *“I traveled alone. I didn't*  
336 *know Moshi and I didn't know anyone here...I arrived in Moshi at 2 o'clock at night! When I got*  
337 *here at 2am I didn't have any familiarity, I didn't know anyone and there was nobody there. They*  
338 *dropped me off along the way. I sat with the child on the roadside.”* (IDI Participant 5)

339

#### 340 **Finances**

341 For the second delay, finances played a key role in the provision of care prior to reaching  
342 KCMC. Households were generally required to pay out-of-pocket (OOP) for all medical  
343 expenses related to their child's illness at intermediary hospitals before obtaining a KCMC  
344 referral. A participant explained how financial concerns of paying for medical care prohibited  
345 them from attending the clinic stating, *“There was a month when I couldn't go. They told me I*  
346 *needed to bring 240,000 shillings for the child to undergo a test. The date arrived, but I hadn't*  
347 *received the money..”* (IDI Participant 8)

348

349 Similar to the first delay, more than half of participants described how they had to sell  
350 possessions or borrow money to continue seeking care. An interviewee explained how they both  
351 borrowed money and sold livestock to pay for medical expenses, *“I borrowed money from*  
352 *someone, and when I returned home, I sold some items at home to pay them back. I also sold*  
353 *some of my cows to continue with my child's treatment.”* (IDI Participant 4) Another participant  
354 suggested how households can end up with *“nothing”* after selling these possessions, *“If you*  
355 *have cows, you sell them. If you have something, you sell it. It all ends, and you find that nothing*  
356 *is left.”* (IDI Participant 12)

357

358 **Delay 3 - Receiving Care**

359 **Care received at KCMC**

360 Participants discussed the care they had received at KCMC, often describing how the child was  
361 diagnosed and their perspective of what treatment was being provided. One participant outlined  
362 the initial care provided by KCMC clinical staff, *“they started running tests on his head, and the  
363 next day, they told me that he needed surgery to prevent it from spreading to the other eye. He  
364 had the surgery, and I stayed there for three days before coming here to the cancer ward.”* (IDI  
365 Participant 6)

366  
367 Although most caregivers opted to begin treatment immediately for their child at KCMC,  
368 potential delays presented for families who returned home before initiating treatment. One  
369 mother describes her experience after obtaining her child’s cancer diagnosis, *“When we came  
370 here to KCMC in July, the eye was not that swollen, and the eye had not come out and the  
371 examination revealed the cancer... After they gave me the results, I went back home...I tried  
372 covering the eye that had no disease, and I gave the child something to look at, but I realized he  
373 couldn't see it nor anything else. That's when I made up my mind to come back.”* (IDI Participant  
374 5)

375

376 **Caregiver concerns**

377 Participants described some of their worries about being away from home such as familial  
378 relationships, household economic implications of obtaining care, and the health trajectory of  
379 their child. A participant describes their worries about the additional children at home and how  
380 being away from home may be impacting the children’s school attendance, *“Yes, worrying is a*

381 *must because we left our young children at home. They go to school on their own, and if I'm not*  
382 *there, they might only go for two or three days a week, or sometimes they don't go at all.”* (IDI  
383 Participant 3) Another respondent expressed the sense of hopelessness that can accompany a  
384 cancer diagnosis. *“There is no worse illness than this. You need great support. I see people here*  
385 *laughing and appearing well-fed, and I feel like something is wrong in their brains this is not a*  
386 *place to laugh; it's not a safe place. I'd prefer being in jail than here because in jail, you'll*  
387 *eventually get out alive, but here, it's by grace.”* (IDI Participant 12)

388  
389 Nearly half of participants described how they drew upon their religious or spiritual beliefs to  
390 manage their worries and find a sense of comfort and “*grace*” (IDI Participant 11). One  
391 participant stated, *“I just pray to God, rely on him, and ask God for strength. When I pray and*  
392 *lean on God, the fear diminishes.”* (IDI Participant 4) Further, a child’s uncle suggests how the  
393 pride they feel in reaching care has lessened their concerns, *“I don't have any worries because I*  
394 *have saved a life. I only think about the child I have saved.”* (IDI Participant 2)

395  
396 **Treatment success**

397 Despite concerns, participants expressed a sense of hope in their perceived effectiveness of the  
398 treatment provided at KCMC. Nearly all participants felt like their child would complete the  
399 treatment plan, rarely noting additional delays that may prevent them continuing to receive  
400 services. Caregivers felt reassured by the progress in their child’s condition, which motivated  
401 them to continue with the treatment plan. One respondent said, *“just seeing the child playing*  
402 *gives me some peace of mind.”* (IDI Participant 5) Another participant expressed their  
403 satisfaction with KCMC as a medical facility compared to another hospital, *“KCMC is the*

404 *biggest and the best treatment here... So, if anyone has a problem, I will tell them to directly*  
405 *come to KCMC for salvation.”* (IDI Participant 2)

#### 406 **Finances**

407 Finally, participants described how finances impacted their ability to continue receiving  
408 oncology care and avoid treatment abandonment. When asked if they experienced any stress  
409 regarding paying for oncology care, one mother noted how the philanthropic financing available  
410 at KCMC allows her to not have financial worries stating, *“Not at all, because they told me that*  
411 *the child's treatment costs here at the hospital are covered. They told me there are no expenses,*  
412 *my cost is my time.”* (IDI Participant 7) Overall, participants expressed a sense of relief in  
413 knowing they would be able to continue treatment for their child without incurring catastrophic  
414 medical expenses. However, before arriving to KCMC, respondents were unaware of this  
415 financing option and often noted how the perceived price of treatment in Moshi was  
416 *“incomprehensible”* (IDI Participant 2). One participant said, *“I knew that it might involve a lot*  
417 *of money because we are used to hearing that when you hear about KCMC, you know you need*  
418 *to be well-prepared. They say the tests themselves are expensive, and just entering the hospital*  
419 *itself is costly, unlike other hospitals.”* (IDI Participant 3)

420  
421 While this did not necessarily cause a delay in the continuation of care, participants discussed  
422 how they had to forego their normal employment or livelihood activities regardless of the free  
423 treatment provided. One mother explained how the lost income will impact her family, *“It affects*  
424 *us significantly because my job was a great source of income... It's the biggest challenge that I*  
425 *see affecting our lives.”* (IDI Participant 4)

426

427 **DISCUSSION**

428 To the best of our knowledge, this is the first paper to qualitatively apply the Three Delays  
429 Model to pediatric cancer care in Northern Tanzania. Most notably, we report the most  
430 substantial delays occur once families have sought care and experience barriers related to the  
431 Tanzanian referral system and health infrastructure capacity. While global health research has  
432 pushed for decentralized healthcare expansion in LMICs, health system capacity must  
433 concurrently advance to support the appropriate delivery of pediatric cancer care. Overall, an  
434 increase in community and clinical resources aimed at reducing financial constraints and  
435 ensuring quality, timely access to pediatric oncology care is required in Tanzania. Further, we  
436 recommend that future interventions extend beyond basic access to care to include holistic  
437 strategies that aid families in completing full treatment regimes.

438  
439 Respondents described initial delays due to waiting for the child's condition to resolve or  
440 deteriorate before seeking medical care. Although caregivers expressed how they identified  
441 symptoms and changes in the child's behavior, unlike injurious or emergency conditions, early  
442 signs of pediatric cancer can be difficult to discern. Due to the complexities of recognizing signs  
443 of pediatric cancer, we recommend that community health workers (CHWs) and traditional  
444 healers be trained to identify and suggest when further medical treatment should be sought. For  
445 example, a study conducted in Cameroon developed an early recognition and referral training for  
446 primary healthcare workers, including traditional healers, and found that healthcare workers  
447 knowledge of early childhood cancer symptoms increased by 52% after completing the training  
448 program.(18) The WHO Global Strategy on Human Resources for Health further suggests the  
449 value of CHWs, and urges countries to embrace CHWs as diverse and sustainable primary

450 healthcare professionals.(19,20) Building on the current literature and global recommendations,  
451 future interventions should engage CHWs and traditional healers in cost-effective and culturally  
452 reflective pediatric cancer training and outreach, thus limiting delays at the household level.

453  
454 Out of all the barriers mentioned, health system barriers were the most often discussed among  
455 respondents. While the stepwise referral system in Tanzania has benefits for preventing the  
456 treatment of mild conditions at high-level facilities, our study suggests that the referral system  
457 hindered patients from obtaining care in a timely manner. Keating et al. report that referral  
458 delays for severe pediatric illnesses put children at greater risk for mortality in Tanzania, which  
459 we believe to be applicable to pediatric cancer.(4) Additionally, the costs associated with  
460 misdiagnosis and ineffective treatments were considerable and prohibited some participants from  
461 accessing referrals promptly. While caregiver's did not perceive this referral system to have  
462 hindered the overall treatment or prognosis of their child, the global pediatric oncology literature  
463 strongly supports the necessity of prompt diagnosis for treatment effectiveness, minimizing out-  
464 of-pocket (OOP) costs, and reducing the suffering accompanying a cancer diagnosis.(21)  
465 Households in LMICs, such as Tanzania, are more likely to finance medical expenses by selling  
466 assets, using personal savings, and borrowing money, impacting the long-term socioeconomic  
467 status of the household.(22) These financial strategies are supported by the data we present and  
468 are exacerbated by the lack of health insurance in our study sample. Smith et al. has highlighted  
469 the cost-effectiveness, economic growth, and equity building that investment in global pediatric  
470 surgical care produces, principles relevant to global pediatric cancer care.(23) Therefore,  
471 progressive financial protection schemes such as individual-level support for financing indirect  
472 medical expenses such as lodging, food, and transportation and macro-level interventions such as

473 the inclusion of pediatric oncology diagnosis and treatment in universal health coverage (UHC)  
474 plans must be considered. In addition, it will be critical that the capacity to recognize children  
475 with potential cancer conditions improves at smaller health facilities. To minimize disease  
476 progression and household OOPs costs, workers within these facilities should be trained to  
477 identify concerning symptoms of pediatric cancer and refer these patients to a definitive  
478 treatment facility. Efforts addressing these concerns have proven successful in Tanzania with  
479 Muhimbili National Hospital reporting an 8% treatment abandonment rate for acute leukemia  
480 after accommodation was provided for families of children obtaining cancer care in addition to  
481 infrastructure advancements.(24,25)

482  
483 While the severity of cancer was well known, respondents expressed varying thoughts  
484 surrounding the causes of cancer, how cancer may reoccur, treatment strategies, and follow up  
485 care. Participants also suggested the importance of spirituality and support networks for coping  
486 with their child's diagnosis. The feelings described by participants represent the necessity of  
487 clear health education and tangible strategies for managing the emotions that accompany a  
488 cancer diagnosis. The National Cancer Institute (NIC) has developed six elements of patient-  
489 centered communication in cancer care including 1) fostering healing relationships, 2)  
490 responding to emotions, 3) exchanging information, 4) making decisions, 5) managing  
491 uncertainty, and 6) enabling self-management.(26) While these elements have mostly been  
492 applied to HICs, a review has recommended the NCI guidelines as a baseline for further research  
493 and intervention in LMICs.(27) For example, cancer support groups have been implemented in  
494 numerous settings to support families in HICs. However, similar programs have yet to be widely  
495 incorporated in LMICs. Participant responses detailing worries about being away from home and



496 the confusion that accompanied their child’s cancer diagnosis suggests that future childhood  
497 cancer interventions could focus on delivering comprehensible health education and providing  
498 supportive spaces for managing fears and uncertainty. Due to treatment abandonment concerns,  
499 this extension of health education is especially valuable in pediatric oncology settings where  
500 routine follow-up care is necessary.

501  
502 While these results will inform future interventions aimed at increasing the quality and  
503 accessibility of pediatric cancer care in Tanzania, our study contains important limitations. Like  
504 any qualitative research study, these findings are not intended to be representative of the entire  
505 pediatric oncology patient population. Rather, this study intends to detail the journey to pediatric  
506 cancer care and identify potential opportunities for intervention that support timely and quality  
507 service provision. Second, while the thematic codebook underwent routine discussion and  
508 adaptation based on the perspectives of research team members based at KCMC, not all  
509 interviews were doubled coded, and agreeability was determined by a random sample of 6  
510 interviews. While this is a notable limitation, no major discrepancies in coding outcomes were  
511 noted. between Lastly, we report perspectives of only households who received care at KCMC,  
512 excluding the perspectives of families who were unsuccessful in reaching a final destination for  
513 oncology treatment and therefore may have experienced more significant barriers to accessing  
514 care.

515  
516 **CONCLUSION**  
517 In this qualitative study, we report on the journey to pediatric cancer care beginning at the  
518 household level and extending beyond care received at KCMC to describe stressors and plans for

519 the future. Our recommendations include 1) empowerment of CHWs and local traditional healers  
520 to advocate for earlier care seeking behavior at the community level, 2) implementation of  
521 financial protection, clinical structures, and training at intermediary medical centers aimed at  
522 earlier referral to a definitive treatment facility, 3) incorporation of support and health education  
523 initiatives for families of children with a cancer diagnosis. Most importantly, in accordance with  
524 the United Nation’s target of achieving universal health coverage (UHC) worldwide by  
525 2030,(28) future national health plans should include pediatric cancer care.

526 *Funding:* This research was supported by the Duke Global Health Institute and the National  
527 Institutes of Health K01

528 *Competing Interests:* The authors declare no competing interests

529

530 **Author Contributions**

531 Conceptualization: MM, ERS, HER, PE, CC-C

532 Methodology: MM, ERS, AT, PE

533 Formal Analysis and Investigation: MM, ERS, HK, AT, PE

534 Data Collection: MM, HK, EM

535 Writing - Original Draft Preparation: MM, ERS

536 Writing - Review and Editing: MM, AT, JRV, CAS, ERS, HER, CC-C

537 Funding Acquisition: ERS, CAS, EM, BTM

538 Supervision: ERS, EM, BTM, CAS

539 REFERENCES

- 540 1. Atun R, Bhakta N, Denburg A, Frazier AL, Friedrich P, Gupta S, et al. Sustainable care for  
541 children with cancer: a Lancet Oncology Commission. *Lancet Oncol*. 2020 Apr  
542 1;21(4):e185–224.
- 543 2. The Global Initiative for Childhood Cancer [Internet]. [cited 2023 Feb 16]. Available from:  
544 <https://www.who.int/initiatives/the-global-initiative-for-childhood-cancer>
- 545 3. Farmer P, Frenk J, Knaul FM, Shulman LN, Alleyne G, Armstrong L, et al. Expansion of  
546 cancer care and control in countries of low and middle income: a call to action. *The Lancet*.  
547 2010 Oct 2;376(9747):1186–93.
- 548 4. Keating EM, Sakita F, Mmbaga BT, Amiri I, Nkini G, Rent S, et al. Three delays model  
549 applied to pediatric injury care seeking in Northern Tanzania: A mixed methods study. *PLOS*  
550 *Glob Public Health*. 2022 Aug 25;2(8):e0000657.
- 551 5. Hosaka L, Tupetz A, Sakita FM, Shayo F, Staton C, Mmbaga BT, et al. A qualitative  
552 assessment of stakeholder perspectives on barriers and facilitators to emergency care delays  
553 in Northern Tanzania through the Three Delays. *Afr J Emerg Med*. 2023 Sep;13(3):191–8.
- 554 6. UNICEF DATA [Internet]. [cited 2023 Aug 31]. United Republic of Tanzania (TZA) -  
555 Demographics, Health & Infant Mortality. Available from:  
556 <https://data.unicef.org/country/tza/>
- 557 7. Majaliwa E, Smith ER, Cotache-Condor C, Rice H, Gwanika Y, Canick J, et al. Childhood  
558 and Adolescent Cancer Care at a Tertiary Hospital in Northern Tanzania: A Retrospective  
559 Study. *JCO Glob Oncol*. 2023 Sep;(9):e2200263.
- 560 8. Greenspan JA, Chebet JJ, Mpembeni R, Mosha I, Mpunga M, Winch PJ, et al. Men’s roles in  
561 care seeking for maternal and newborn health: a qualitative study applying the three delays  
562 model to male involvement in Morogoro Region, Tanzania. *BMC Pregnancy Childbirth*.  
563 2019 Aug 13;19(1):293.
- 564 9. Thaddeus S, Maine D. Too far to walk: maternal mortality in context. *Soc Sci Med* 1982.  
565 1994 Apr;38(8):1091–110.
- 566 10. Cotache-Condor C, Kantety V, Grimm A, Williamson J, Landrum KR, Schroeder K, et al.  
567 Determinants of delayed childhood cancer care in low- and middle-income countries: A  
568 systematic review. *Pediatr Blood Cancer*. 2023 Mar;70(3):e30175.
- 569 11. Steliarova-Foucher E, Colombet M, Ries LAG, Moreno F, Dolya A, Bray F, et al.  
570 International incidence of childhood cancer, 2001–10: a population-based registry study.  
571 *Lancet Oncol*. 2017 Jun 1;18(6):719–31.
- 572 12. Johnston WT, Erdmann F, Newton R, Steliarova-Foucher E, Schüz J, Roman E. Childhood  
573 cancer: Estimating regional and global incidence. *Cancer Epidemiol*. 2021 Apr 1;71:101662.
- 574 13. About Us [Internet]. [cited 2023 Jan 23]. Available from: <https://www.kcmc.ac.tz/about>

- 575 14. Cancer Care [Internet]. [cited 2023 Sep 9]. Available from: [https://www.kcmc.ac.tz/cancer-](https://www.kcmc.ac.tz/cancer-care)  
576 care
- 577 15. pgssc [Internet]. [cited 2024 Apr 9]. Old\_National Surgical Planning. Available from:  
578 <https://www.pgssc.org/national-surgical-planning>
- 579 16. Lumivero [Internet]. [cited 2023 Oct 26]. NVivo. Available from:  
580 <https://lumivero.com/products/nvivo/>
- 581 17. Tong A, Sainsbury P, Craig J. Consolidated criteria for reporting qualitative research  
582 (COREQ): a 32-item checklist for interviews and focus groups. *Int J Qual Health Care J Int*  
583 *Soc Qual Health Care*. 2007 Dec;19(6):349–57.
- 584 18. Afungchwi GM, Hesseling PB, Kouya F, Enow SA, Kruger M. The outcome and cost of a  
585 capacity-building training programme on the early recognition and referral of childhood  
586 cancer for healthcare workers in North-West Cameroon. *Nurs Open*. 2020;7(6):2029–38.
- 587 19. Global strategy on human resources for health: Workforce 2030 [Internet]. [cited 2024 Jun  
588 26]. Available from: <https://www.who.int/publications/i/item/9789241511131>
- 589 20. Community-based health workers (CHWs) [Internet]. [cited 2024 Jun 26]. Available from:  
590 <https://www.who.int/teams/health-workforce/community>
- 591 21. Childhood cancer [Internet]. [cited 2023 Sep 19]. Available from:  
592 <https://www.who.int/news-room/fact-sheets/detail/cancer-in-children>
- 593 22. Donkor A, Atuwu-Ampoh VD, Yakanu F, Torgbenu E, Ameyaw EK, Kitson-Mills D, et al.  
594 Financial toxicity of cancer care in low- and middle-income countries: a systematic review  
595 and meta-analysis. *Support Care Cancer*. 2022 Sep 1;30(9):7159–90.
- 596 23. Smith ER, Concepcion TL, Niemeier KJ, Ademuyiwa AO. Is Global Pediatric Surgery a  
597 Good Investment? *World J Surg*. 2019 Jun 1;43(6):1450–5.
- 598 24. Schroeder K, Saxton A, McDade J, Chao C, Masalu N, Chao C, et al. Pediatric Cancer in  
599 Northern Tanzania: Evaluation of Diagnosis, Treatment, and Outcomes. *J Glob Oncol*. 2017  
600 Jun 9;4:JGO.2016.009027.
- 601 25. Kersten E, Scanlan P, DuBois SG, Matthay KK. Current treatment and outcome for  
602 childhood acute leukemia in Tanzania. *Pediatr Blood Cancer*. 2013;60(12):2047–53.
- 603 26. Epstein RM, Street Jr. RL. Patient-centered communication in cancer care: Promoting  
604 healing and reducing suffering. 2007;
- 605 27. Graetz DE, Garza M, Rodriguez-Galindo C, Mack JW. Pediatric cancer communication in  
606 low- and middle-income countries: A scoping review. *Cancer*. 2020;126(23):5030–9.
- 607 28. Universal health coverage (UHC) [Internet]. [cited 2023 Feb 5]. Available from:  
608 [https://www.who.int/news-room/fact-sheets/detail/universal-health-coverage-\(uhc\)](https://www.who.int/news-room/fact-sheets/detail/universal-health-coverage-(uhc))
